# Supplementary material
Source: publisher site journal article supplement (https://www.dovepress.com/article/296516)
Supplement: Supplementary file 1 [file get_supplementary_file.php]

Estimation Of Risk Of Death Attributable To Acute Gastroenteritis Not Caused By *Clostridioides difficile* Infection Among Hospitalized Adults In England.

Table of Contents

[Supplemental table 1. ICD-10 codes 2](#_Toc66106276)

[Supplemental table 2. Read codes 4](#_Toc66106277)

# Supplemental table 1. ICD-10 codes

| **ICD-10** | **ICD-10 Label** | **Class Type** |
| --- | --- | --- |
| A00 | Cholera | OTHER BACTERIAL |
| A00.0 | Cholera due to Vibrio cholerae 01, biovar cholerae | OTHER BACTERIAL |
| A00.1 | Cholera due to Vibrio cholerae 01, biovar eltor | OTHER BACTERIAL |
| A00.9 | Cholera, unspecified | OTHER BACTERIAL |
| A01 | Typhoid and paratyphoid fevers | OTHER BACTERIAL |
| A01.0 | Typhoid fever | OTHER BACTERIAL |
| A01.1 | Paratyphoid fever A | OTHER BACTERIAL |
| A01.2 | Paratyphoid fever B | OTHER BACTERIAL |
| A01.3 | Paratyphoid fever C | OTHER BACTERIAL |
| A01.4 | Paratyphoid fever, unspecified | OTHER BACTERIAL |
| A02 | Other salmonella infections | OTHER BACTERIAL |
| A02.0 | Salmonella enteritis | OTHER BACTERIAL |
| A02.1 | Salmonella sepsis | OTHER BACTERIAL |
| A02.2 | Localized salmonella infections | OTHER BACTERIAL |
| A02.8 | Other specified salmonella infections | OTHER BACTERIAL |
| A02.9 | Salmonella infection, unspecified | OTHER BACTERIAL |
| A03 | Schigela | OTHER BACTERIAL |
| A03.0 | Shigellosis due to Shigella dysenteriae | OTHER BACTERIAL |
| A03.1 | Shigellosis due to Shigella flexneri | OTHER BACTERIAL |
| A03.2 | Shigellosis due to Shigella boydii | OTHER BACTERIAL |
| A03.3 | Shigellosis due to Shigella sonnei | OTHER BACTERIAL |
| A03.8 | Other shigellosis | OTHER BACTERIAL |
| A03.9 | Shigellosis, unspecified | OTHER BACTERIAL |
| A04 | Other bacterial intestinal infections | NOS |
| A04.0 | Enteropathogenic Escherichia coli infection | OTHER BACTERIAL |
| A04.1 | Enterotoxigenic Escherichia coli infection | OTHER BACTERIAL |
| A04.2 | Enteroinvasive Escherichia coli infection | OTHER BACTERIAL |
| A04.3 | Enterohemorrhagic Escherichia coli infection | OTHER BACTERIAL |
| A04.4 | Other intestinal Escherichia coli infections | OTHER BACTERIAL |
| A04.5 | Campylobacter enteritis | OTHER BACTERIAL |
| A04.6 | Enteritis due to Yersinia enterocolitica | OTHER BACTERIAL |
| A04.7 | Enterocolitis due to Clostridium difficile | CDIFF |
| A04.8 | Other specified bacterial intestinal infections | NOS |
| A04.9 | Bacterial intestinal infection, unspecified | NOS |
| A05 | Other bacterial foodborne intoxications, not elsewhere classified | NOS |
| A05.0 | Foodborne staphylococcal intoxication | OTHER BACTERIAL |
| A05.1 | Botulism food poisoning | OTHER BACTERIAL |
| A05.2 | Foodborne Clostridium perfringens [Clostridium welchii] intoxication | OTHER BACTERIAL |
| A05.3 | Foodborne Vibrio parahaemolyticus intoxication | OTHER BACTERIAL |
| A05.4 | Foodborne Bacillus cereus intoxication | OTHER BACTERIAL |
| A05.5 | Foodborne Vibrio vulnificus intoxication | OTHER BACTERIAL |
| A05.8 | Other specified bacterial foodborne intoxications | NOS |
| A05.9 | Bacterial foodborne intoxication, unspecified | NOS |
| A06.0 | Acute amebic dysentery | PARASITIC |
| A06.1 | Chronic intestinal amoebiasis | PARASITIC |
| A06.2 | Amoebic nondysenteric colitis | PARASITIC |
| A06.3 | Amoeboma of intestine | PARASITIC |
| A06.8 | Amoebic infection of other sites | PARASITIC |
| A06.9 | Amoebiasis, unspecified | PARASITIC |
| A07 | Other protozoal intestinal diseases | PARASITIC |
| A07.0 | Balantidiasis | PARASITIC |
| A07.1 | Giardiasis | PARASITIC |
| A07.2 | Cryptosporidiosis | PARASITIC |
| A07.3 | Isosporiasis | PARASITIC |
| A07.8 | Other specified protozoal intestinal diseases | PARASITIC |
| A07.9 | Protozoal intestinal disease, unspecified | PARASITIC |
| A08.0 | Rotaviral enteritis | ROTA |
| A08.1 | Acute gastroenteropathy due to Norwalk agent and other small round viruses | NORO |
| A08.2 | Adenoviral enteritis | OTHER VIRAL |
| A08.3 | Other viral enteritis | NOS |
| A08.4 | Viral intestinal infection, unspecified | NOS |
| A08.5 | Other specified intestinal infections | NOS |
| A09 | Other gastroenteritis and colitis of infectious and unspecified origin | NOS |
| A09.0 | Other and unspecified gastroenteritis and colitis of infectious origin | NOS |
| A09.9 | Gastroenteritis and colitis of unspecified origin | NOS |
| K52.8 | Other specified noninfective gastroenteritis and colitis | NOS |
| K52.9 | Noninfective gastroenteritis and colitis, unspecified | NOS |
| R19.7 | Diarrhea, unspecified | NOS |

NOS = not otherwise specified

# Supplemental table 2. Read codes

| **Read code** | **Read term** | **Class Type** |
| --- | --- | --- |
| 19F..00 | Diarrhoea symptoms | NOS |
| 19F..11 | Diarrhoea | NOS |
| 19F2.00 | Diarrhoea | NOS |
| 19FZ.00 | Diarrhoea symptom NOS | NOS |
| 19FZ.11 | Diarrhoea & vomiting, symptom | NOS |
| 19G..00 | Diarrhoea and vomiting | NOS |
| 43jf.00 | Norovirus nucleic acid detection | NORO |
| 43jw.00 | Norovirus (small round-structured viruses) nucleic acid detn | NORO |
| 43k9.00 | Clostridium difficile antigen detection | CDIFF |
| 4A2A.11 | Parasite in vomit O/E | PARASITIC |
| 4JD2000 | Clostridium difficile toxin A detected | CDIFF |
| 9G1..11 | Food poison notific admin | NOS |
| A0...12 | Food poisoning | NOS |
| A020.00 | Salmonella gastroenteritis | OTHER BACTERIAL |
| A042.00 | Clostridium perfringens food poisoning | OTHER BACTERIAL |
| A043.00 | Other clostridia causing food poisoning | OTHER BACTERIAL |
| A04y000 | Foodborne Bacillus cereus intoxication | OTHER BACTERIAL |
| A04z.00 | Food poisoning NOS | NOS |
| A07..00 | Intestinal infection due to other organisms | NOS |
| A070.00 | Escherichia coli gastrointestinal tract infection | OTHER BACTERIAL |
| A070000 | Enteropathogenic Escherichia coli infection | OTHER BACTERIAL |
| A070100 | Enterotoxigenic Escherichia coli infection | OTHER BACTERIAL |
| A070200 | Enteroinvasive Escherichia coli infection | OTHER BACTERIAL |
| A070300 | Enterohaemorrhagic Escherichia coli infection | OTHER BACTERIAL |
| A072.00 | Aerobacter aerogenes gastrointestinal tract infection | OTHER BACTERIAL |
| A073.00 | Proteus gastrointestinal tract infection | OTHER BACTERIAL |
| A073000 | Proteus mirabilis gastrointestinal tract infection | OTHER BACTERIAL |
| A073z00 | Proteus gastrointestinal tract infection NOS | OTHER BACTERIAL |
| A074.00 | Other specified gastrointestinal tract bacterial infection | NOS |
| A074000 | Staphylococcal gastrointestinal tract infection | OTHER BACTERIAL |
| A074011 | Diarrhoea due to staphylococcus | OTHER BACTERIAL |
| A074012 | Diarrhoea due to staphylococcal toxin | OTHER BACTERIAL |
| A074100 | Pseudomonas gastrointestinal tract infection | OTHER BACTERIAL |
| A074111 | Diarrhoea due to Pseudomonas pyocyanea | OTHER BACTERIAL |
| A074300 | Campylobacter gastrointestinal tract infection | OTHER BACTERIAL |
| A074311 | Diarrhoea due to Campylobacter jejuni | OTHER BACTERIAL |
| A074312 | Campylobacter enteritis | OTHER BACTERIAL |
| A074400 | Enteritis due to Yersinia enterocolitica | OTHER BACTERIAL |
| A074y00 | Other specified other gastrointestinal infection | NOS |
| A074z00 | Other specified gastrointestinal tract infections NOS | NOS |
| A075.00 | Unspecified bacterial enteritis | NOS |
| A076.00 | Enteritis due to specified virus | NOS |
| A076.11 | Viral diarrhoea | NOS |
| A076.12 | Viral vomiting | NOS |
| A076000 | Enteritis due to adenovirus | OTHER VIRAL |
| A076100 | Enteritis due to enterovirus | OTHER VIRAL |
| A076200 | Enteritis due to rotavirus | ROTA |
| A076300 | Enteritis due to norovirus | NORO |
| A076z00 | Enteritis due to specified virus NOS | NOS |
| A07y.00 | Gastrointestinal tract infection specified organism NEC | NOS |
| A07y000 | Viral gastroenteritis | NOS |
| A07y100 | Infantile viral gastroenteritis | NOS |
| A07z.00 | Gastrointestinal tract infection specified organism NOS | NOS |
| A080.00 | Infectious colitis, enteritis and gastroenteritis | NOS |
| A080100 | Infectious colitis | NOS |
| A080300 | Infectious gastroenteritis | NOS |
| A080z00 | Infectious colitis, enteritis and gastroenteritis NOS | NOS |
| A081.00 | Colitis, enteritis and gastroenteritis presumed infectious | NOS |
| A081.11 | Colitis enteritis ? infectious | NOS |
| A081200 | Gastroenteritis - presumed infectious origin | NOS |
| A081z00 | Colitis, enteritis and gastroenteritis presumed infect NOS | NOS |
| A082111 | Viral gastroenteritis | NOS |
| A083.00 | Diarrhoea of presumed infectious origin | NOS |
| A083.11 | Diarrhoea & vomiting -? infect | NOS |
| A083.12 | Infantile gastroenteritis | NOS |
| A3Ay200 | Clostridium difficile infection | CDIFF |
| ACz..00 | Intestinal parasitism NOS | PARASITIC |
| Ayu0H00 | [X]Diarrhoea+gastroenteritis of presumed infectious origin | NOS |
| J43..11 | Gastroenteritis | NOS |
| J4z..00 | Non-infective gastroenteritis NOS | NOS |
| J4zz.11 | Diarrhoea - presumed non-infectious | NOS |
| J6A..00 | Gastroenteritis and colitis of unknown origin | NOS |

NOS = not otherwise specified
